# Supplementary material
Source: publisher site journal article supplement (http://www.kjim.org/upload/media/kjim-2020-180-suppl6.pdf)
Supplement: Supplementary file 1 [file kjim-2020-180-suppl6.pdf]

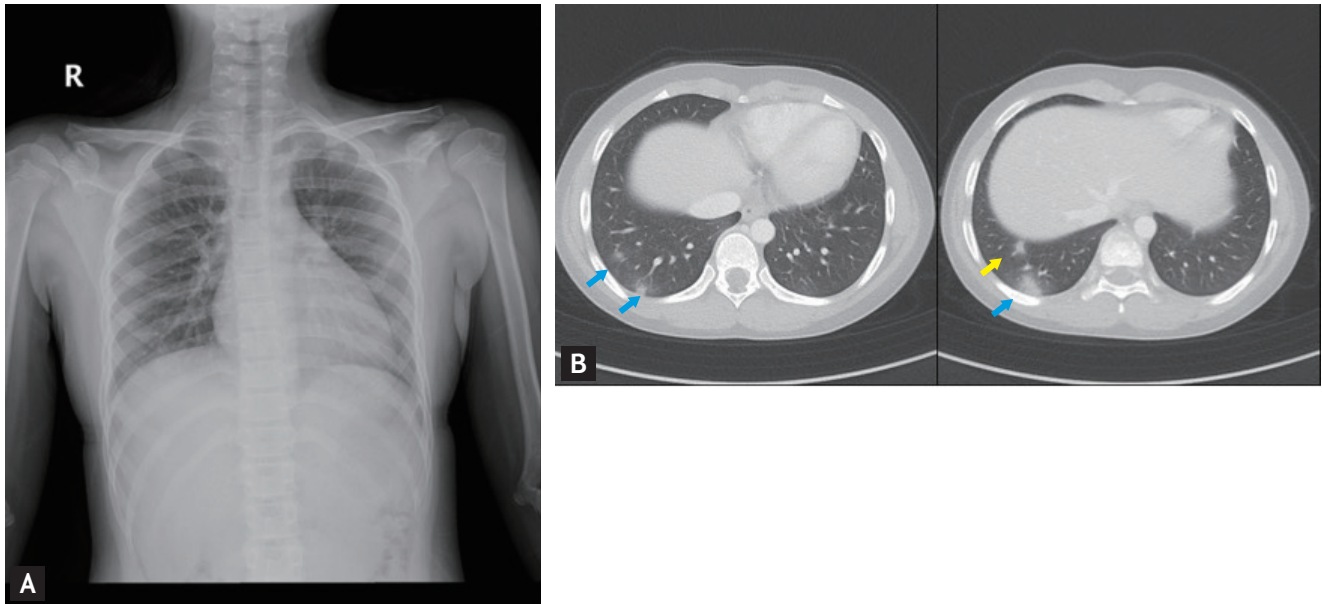

**Supplementary Figure 6.** Case 5; The chest X-ray showed no active lung lesions (A); however, chest computed tomography scan showed multi-focal ground-glass opacities (blue arrows) and consolidation (yellow arrow) in right lower lung field on Day 2 (B).
